# Supplementary material
Source: PubMed Central journal article supplement (PMC5123908)

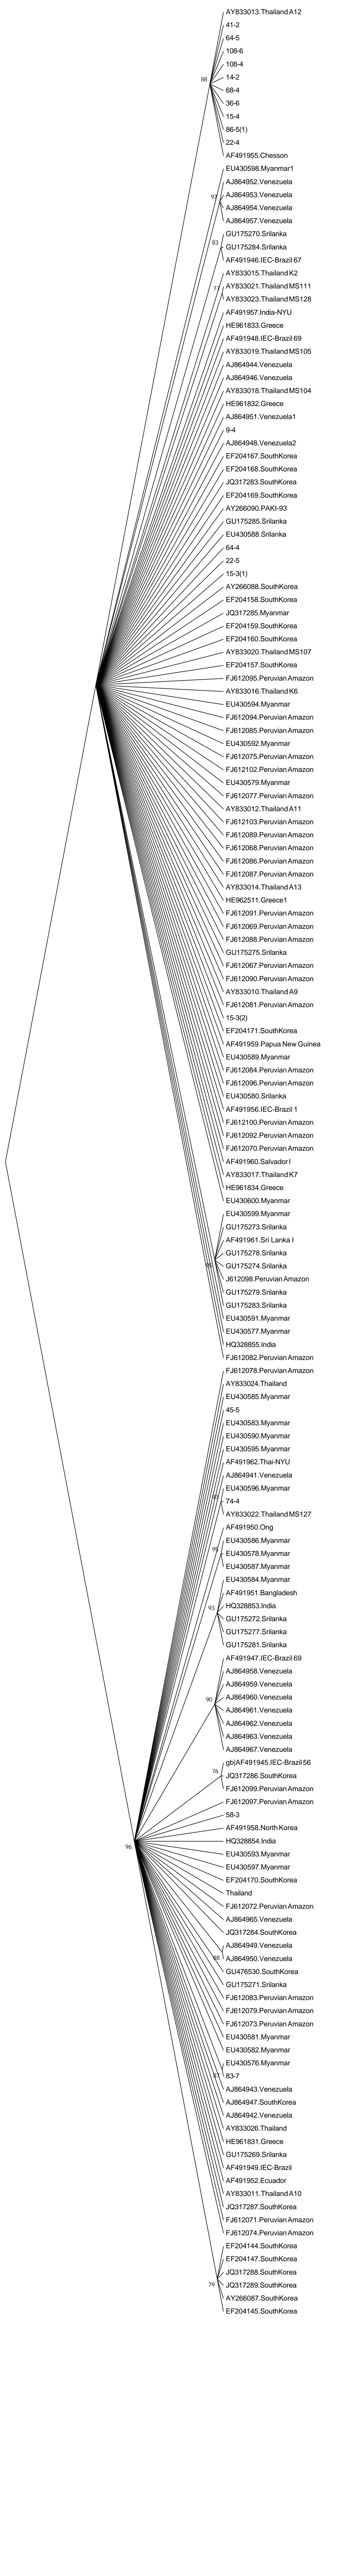

Supplement: NIHMS820600-supplement-1.pdf [file NIHMS820600-supplement-1.pdf]

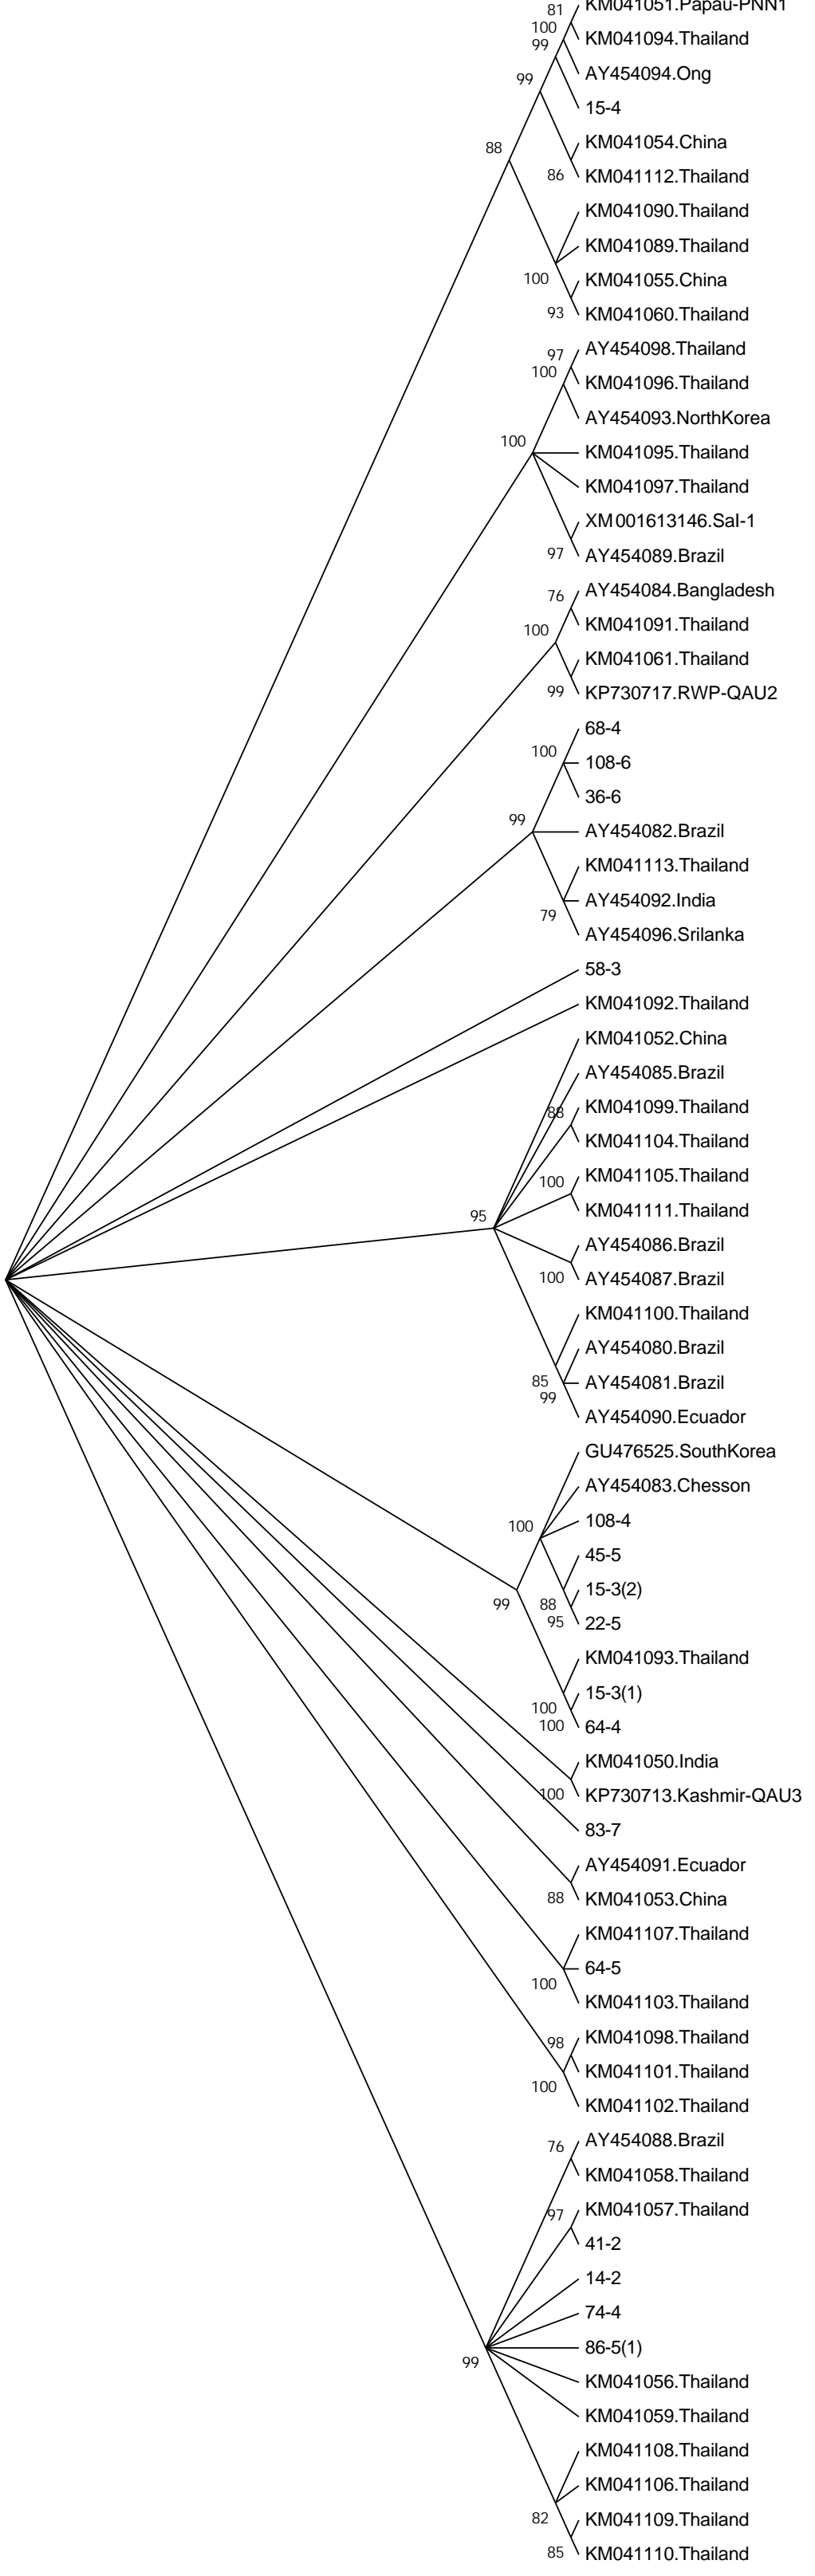

Supplement: NIHMS820600-supplement-2.pdf [file NIHMS820600-supplement-2.pdf]
